# Supplementary material
Source: PubMed Central journal article supplement (PMC4984976)

## Supporting information

### Supplementary Figure legends

#### **Fig. S1: Highly efficient gene silencing in hippocampal slice cultures.**

**(A)** Influence of doxycycline (DOX) on reporter gene activity. Luciferase substrate D-luciferin was applied to slices prepared from the same Tau<sub>RD</sub>ΔK mouse cultured either without DOX (left), with DOX (middle), or from a non-transgenic litter mate (right). Slices were imaged 30 min later. Note that no luciferase activity (photons/sec) is visible in DOX treated cultures (lower panel).

**(B)** To determine the rate of inhibition, slices were cultured without DOX until DIV14. Luciferase activity was measured before and 6 h after application of 2 μg/ml DOX. Already at 6 h the luciferase activity was reduced nearly to control level (n= 5 experiments, 6 slices each, 3 animals, *One way ANOVA followed by Tukey's post-hoc test* \*\*\**p* value < 0.001).

**(C,D)** Slice cultures were prepared from the same transgenic animal, cultured with media alone or with DOX. Treatment was done from DIV1-DIV25 by refreshing DOX every 3 days. At DIV25 western blotting with pan-Tau antibody K9JA did not detect Tau<sub>RD</sub>ΔK in DOX treated samples.

#### **Fig. S2: Early mislocalization of Tau into the somatodendritic compartment.**

**(A)** Immunoreactivity with K9JA antibodies in area CA1. Microphotographs of control slice cultures indicate an axonal distribution of mouse Tau at DIV5 and DIV25.

**(B)** Tau becomes mislocalized into somata and dendrites in the presence of pro-aggregant Tau<sub>RD</sub>ΔK. Mislocalization of Tau was already observed at DIV5, and neurons at DIV25 show dystrophic features like irregularly shaped cell bodies, ballooned and truncated apical dendrites (arrows).

**(C)** Treatment of Tau<sub>RD</sub>ΔK expressing slice cultures with bb14 does not prevent mislocalization of Tau into the soma and dendrites but prevents neuronal dystrophy.

Scale bar: 20μm.

#### **Fig. S3: Activation of microglia in Tau<sub>RD</sub>ΔK expressing slice cultures.**

**(A)** Immunolabelling of microglia by staining with an antibody against Iba1, a marker of activated microglia, indicating inflammatory processes, in control, Tau<sub>RD</sub>ΔK slices

and Tau<sub>RD</sub>ΔK slices treated with bb14 (starting from DIV1) at 25 DIV. Tau<sub>RD</sub>ΔK slices show a higher number of microglia than slices prepared from control mice. Tau<sub>RD</sub>ΔK slices treated with bb14 (from DIV1) showed lower numbers of microglia at DIV25, similar to controls.

**(B)** Visualization of reactive oxygen species (ROS) in living Tau<sub>RD</sub>ΔK slice cultures at DIV15 by the chemiluminescence of the ROS sensitive dye XenoLight RediJect Inflammation probe (Caliper) overlaid onto the photomicrograph.

**(C)** Quantification of ROS production (measured by chemiluminescence as photons/sec) in DIV25 slices from controls, Tau<sub>RD</sub>ΔK and bb14-treated Tau<sub>RD</sub>ΔK slices. Tau<sub>RD</sub>ΔK slices show a significant increase in ROS production ( $F_{(2/15)}=3.789$ ;  $p=0.0466$ ) which was slightly (but not significantly) reduced due to the bb14 treatment (*one-way ANOVA followed by Tukey's post-hoc test* \*  $p\text{-value} < 0.05$ ). Scale bar in **A**: 50μm.

# Supplementary Fig. 1

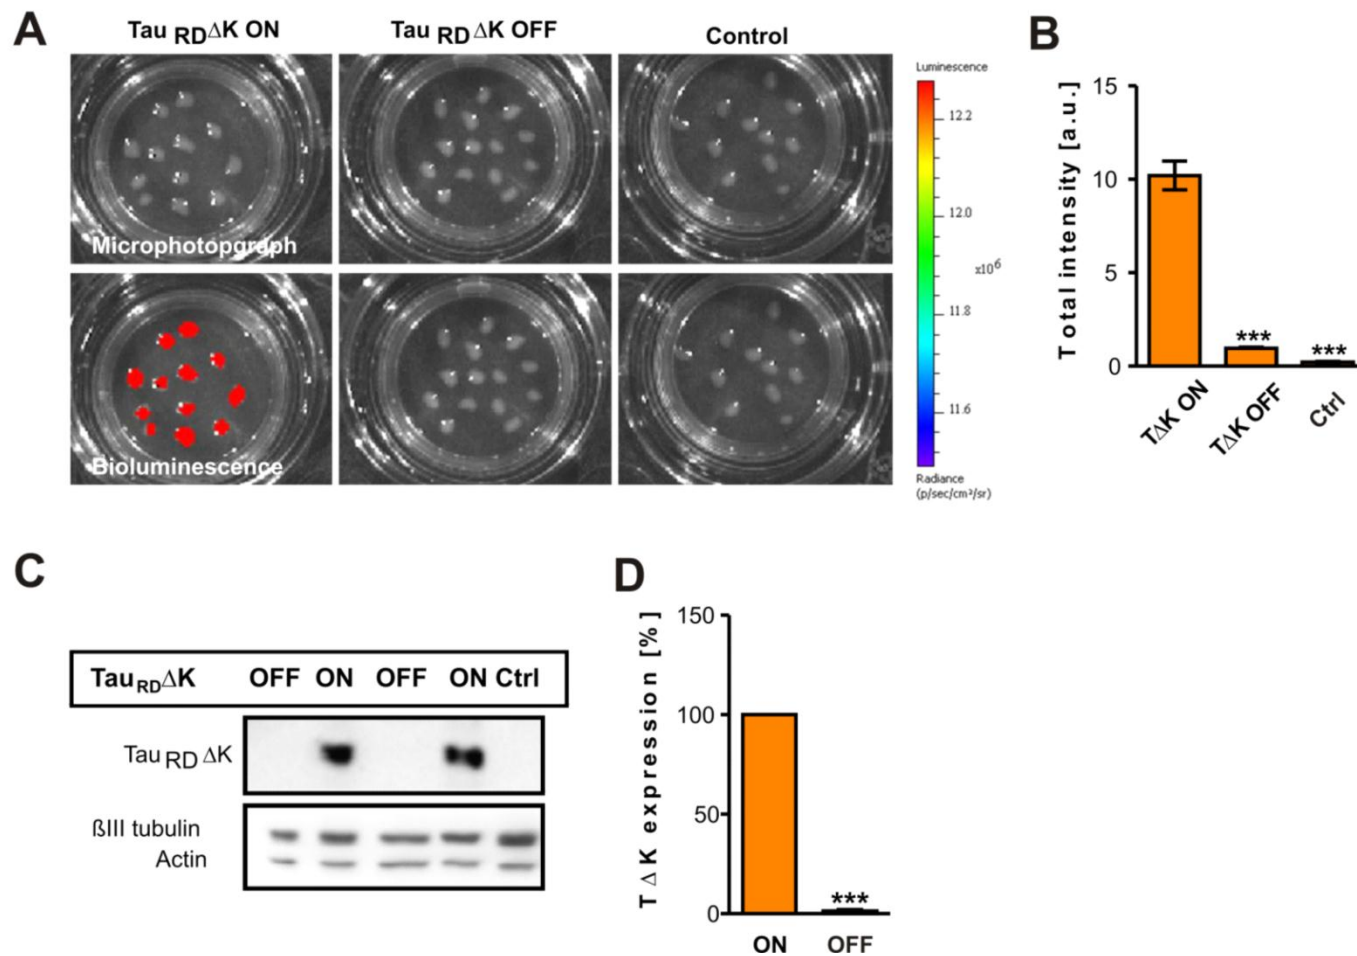

## Supplementary Fig. 2

Tau (K9JA) in area CA1

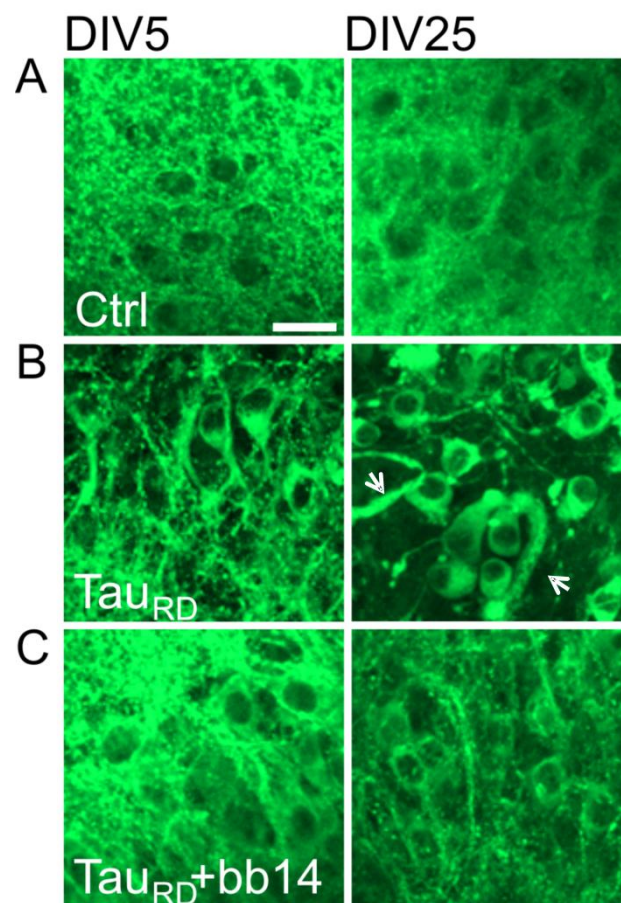

## Supplementary Fig. 3

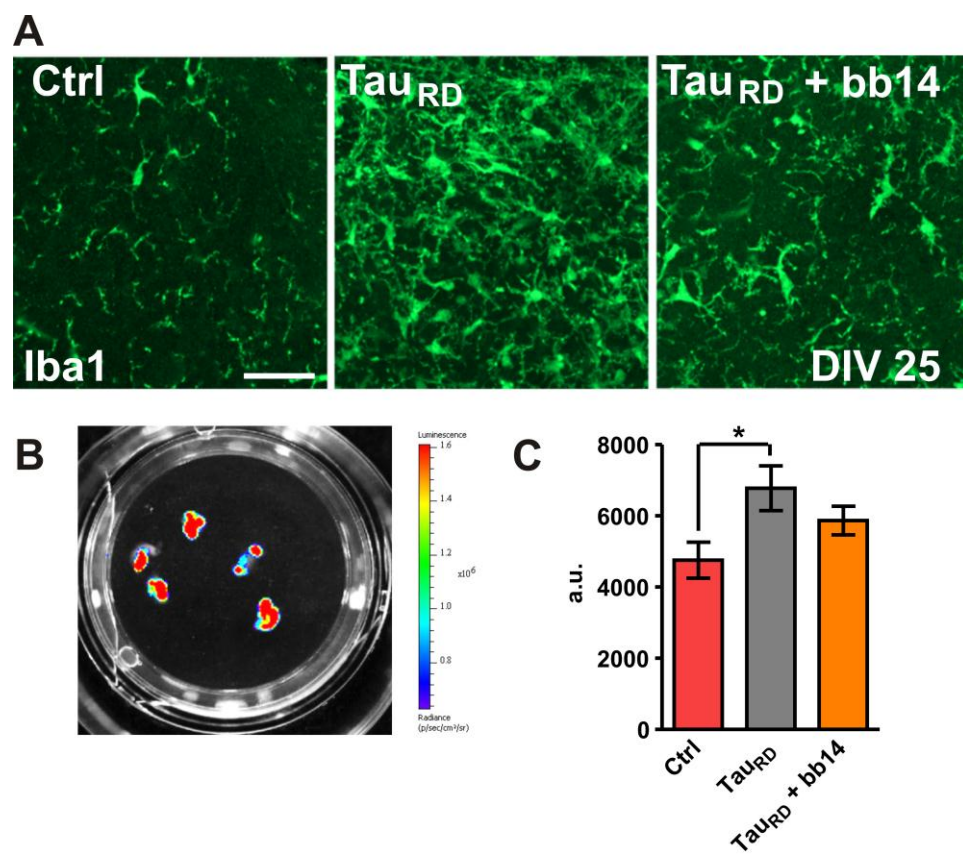

Supplement: NIHMS69414-supplement-Supplementary_Information.pdf [file NIHMS69414-supplement-Supplementary_Information.pdf]
